# Supplementary material for: 12-Year Trends in Active School Transport across Four European Countries—Findings from the Health Behaviour in School-Aged Children (HBSC) Study
Source: PubMed Central journal article supplement (PMC7926861; doi:10.3390/ijerph18042118), 2021-02-22
Supplement: ijerph-18-02118-s001.pdf [file ijerph-18-02118-s001.pdf]

**Supplementary table 1.** Sample size and descriptive statistics of independent variables

| Variable             | Country        | 2006           | 2010      | 2014 | 2018  | Linear trend* |              |
|----------------------|----------------|----------------|-----------|------|-------|---------------|--------------|
| Survey year (n)      | Czech Republic | 4474           | 4206      | 4827 | 11236 | -             |              |
|                      | Norway         | 4074           | 3990      | 2793 | 2613  | -             |              |
|                      | Scotland       | 5720           | 6274      | 5340 | 4563  | -             |              |
|                      | Wales          | 4049           | 4432      | 4739 | 14882 | -             |              |
| Female sex (%)       | Czech Republic | 50.2           | 51.7      | 52.6 | 49.9  | 0.997         |              |
|                      | Norway         | 48.0           | 50.4      | 52.6 | 51.7  | <b>1.014</b>  |              |
|                      | Scotland       | 51.2           | 51.0      | 50.9 | 52.5  | 1.003         |              |
|                      | Wales          | 51.3           | 50.4      | 50.4 | 50.5  | 0.998         |              |
| Age group (%)        | 13 yrs.        | Czech Republic | 33.7      | 33.2 | 33.7  | 34.4          | 0.999        |
|                      |                |                | 15 yrs.   | 35.3 | 35.1  | 35.6          | 33.2         |
|                      | 13 yrs.        | Norway         | 34.3      | 29.4 | 30.6  | 25.4          | <b>0.942</b> |
|                      |                |                | 15 yrs.   | 34.7 | 31.0  | 29.7          | 23.2         |
|                      | 13 yrs.        | Scotland       | 35.6      | 30.7 | 35.4  | 33.4          | 0.977        |
|                      |                |                | 15 yrs.   | 36.2 | 38.4  | 32.5          | 29.2         |
|                      | 13 yrs.        | Wales          | 36.3      | 36.4 | 33.7  | 33.1          | 0.984        |
|                      |                |                | 15 yrs.   | 32.0 | 33.0  | 35.2          | 33.1         |
| Travel time (%)      | <5 min.        | Czech Republic | 24.6      | 21.7 | 18.0  | 18.4          | <b>0.952</b> |
|                      |                |                | 5-15 min. | 51.7 | 47.1  | 44.7          | 47.5         |
|                      | <5 min.        | Norway         | 17.6      | 18.5 | 20.3  | 17.8          | 1.010        |
|                      |                |                | 5-15 min. | 45.5 | 45.2  | 45.3          | 47.3         |
|                      | <5 min.        | Scotland       | 20.3      | 20.1 | 23.1  | 22.1          | 1.012        |
|                      |                |                | 5-15 min. | 44.9 | 43.9  | 43.3          | 43.3         |
|                      | <5 min.        | Wales          | 16.4      | 15.3 | 15.0  | 11.0          | <b>0.944</b> |
|                      |                |                | 5-15 min. | 46.1 | 44.8  | 44.4          | 41.0         |
| Family affluence (M) | Czech Republic | 0.27           | 0.39      | 0.45 | 0.45  | <b>0.014</b>  |              |
|                      | Norway         | 0.57           | 0.65      | 0.62 | 0.61  | <b>0.003</b>  |              |
|                      | Scotland       | 0.38           | 0.48      | 0.53 | 0.55  | <b>0.014</b>  |              |
|                      | Wales          | 0.39           | 0.45      | 0.57 | 0.60  | <b>0.018</b>  |              |

Ref. Age group = 11 year olds, Ref. Time to school = >15 min. Family affluence - rdit transformed to a linear score (0–1). \*Estimates represent odds ratios with exception of family affluence, which are unstandardized regression coefficients. Estimates in bold = p<.001.
